# Supplementary material for: Antihypertensive effect and underlying mechanism of tripeptide NCW on spontaneously hypertensive rats using metabolomics analysis
Source: Royal Society of Chemistry journal article supplement (doi:10.1039/d1fo03924e), 2022-01-01

Table S1 The information of indicated metabolites related to hypertension.

| Metabolite                            | Mode | RT     | MS_level    | Precursor<br>m/z | Detected<br>m/z | HMDB_ID     | Metlin<br>_ID | VIP         | p_value     |
|---------------------------------------|------|--------|-------------|------------------|-----------------|-------------|---------------|-------------|-------------|
| Bile acid                             | P    | 7.1389 | 1           | 353.2467         | 408.2876        | —           | —             | 1.417619272 | 0.013464496 |
| Ursodeoxycholic acid                  | N    | 9.457  | 2-search-DB | 783.5778         | 392.2927        | HMDB0000946 | —             | 1.448699841 | 1.7234E-06  |
| Glycocholic acid                      | P    | 6.79   | 2-search-DB | 488.2975         | 465.309         | HMDB0000138 | 202           | 1.32279313  | 0.026729034 |
| Glycoursodeoxycholic acid             | N    | 8.061  | 2-search-DB | 448.307          | 449.3141        | HMDB0000708 | —             | 1.458432002 | 1.37428E-09 |
| Taurodeoxycholic acid                 | N    | 6.7814 | 1           | 498.2893         | 499.2968        | HMDB00896   | —             | 1.343580894 | 0.000607975 |
| 12-ketochenodeoxycholic acid          | N    | 7.1719 | 1           | 377.27           | 406.2719        | HMDB0000400 | —             | 1.438701692 | 1.76264E-08 |
| TG(a-21:0/i-16:0/10:0)                | P    | 12.041 | 1           | 133.0134         | 280.043         | HMDB0065752 | —             | 1.570660972 | 0.004855736 |
| TG(a-21:0/18:0/15:0)                  | P    | 13.046 | 1           | 207.0323         | 536.153         | HMDB0067196 | —             | 1.60075907  | 0.005968879 |
| TG(i-21:0/14:0/10:0)                  | P    | 12.71  | 1           | 298.0836         | 594.1373        | HMDB0065754 | —             | 1.190016327 | 0.035620744 |
| LysoPC(18:0)                          | P    | 10.03  | 2-search-DB | 568.3393         | 523.3638        | HMDB0010384 | —             | 1.583611266 | 0.004464442 |
| LysoPS(18:1(9Z)/0:0)                  | N    | 7.953  | 2-search-DB | 522.2488         | 523.291         | HMDB0240603 | 40829         | 1.301962058 | 0.000310767 |
| Glycerophosphorylcholine              | P    | 2.446  | 2-MetDNA    | 276.1417         | 258.1101        | HMDB0000086 | —             | 1.392978691 | 0.01639914  |
| PC(22:5(7Z,10Z,13Z,16Z,19Z)/14:1(9Z)) | P    | 9.939  | 1           | 297.0826         | 314.0837        | HMDB0008690 | —             | 1.51171364  | 0.005071407 |
| PC (O-16:0/2:0)                       | P    | 11.16  | 2-search-DB | 546.3634         | 523.3638        | HMDB0062195 | —             | 1.108178927 | 0.043883643 |
| SM(d18:1/24:1(15Z))                   | P    | 12.564 | 1           | 813.6841         | 812.6771        | HMDB0012107 | —             | 1.208825937 | 0.043291199 |
| Methionine sulfoxide                  | P    | 3.566  | 2-search-DB | 166.0498         | 154.1358        | HMDB0002005 | —             | 1.454308473 | 0.018208084 |
| L-Tryptophan                          | P    | 5.319  | 2-search-DB | 251.1028         | 204.0899        | HMDB0000929 | 33            | 1.903783776 | 1.36004E-10 |
| N-(Linolenoyl) Tyrosine               | N    | 7.953  | 1           | 476.2631         | 441.2879        | —           | 64731         | 1.460899334 | 1.86661E-08 |
| Hippuric acid                         | P    | 5.028  | 2-search-DB | 180.0654         | 179.0582        | HMDB0000714 | —             | 1.829399938 | 8.57128E-05 |
| Adenosine                             | P    | 1.431  | 2-search-DB | 268.099          | 267.0968        | HMDB0000050 | 86            | 1.499987744 | 0.009864331 |
| Pantothenic acid                      | P    | 3.458  | 1           | 129.5362         | 219.1107        | HMDB0000210 | 241           | 1.521979018 | 0.00718797  |

Table S1 (Cont.)

| Metabolite                 | Mode | RT      | MS_level    | Precursor<br>m/z | Detected<br>m/z | HMDB_ID     | Metlin<br>_ID | VIP         | p_value     |
|----------------------------|------|---------|-------------|------------------|-----------------|-------------|---------------|-------------|-------------|
| S-Citramalic acid          | P    | 12.0409 | 2-search-DB | 149.0448         | 148.0372        | —           | —             | 1.581312923 | 0.007993563 |
| Propiolic acid             | N    | 1.464   | 2-search-DB | 68.9956          | 70.0055         | HMDB0006804 | 4117          | 1.466785576 | 2.54623E-10 |
| Succinic acid semialdehyde | N    | 1.913   | 2-search-DB | 101.0242         | 102.0317        | HMDB0001259 | —             | 1.316338661 | 0.000230399 |
| 4-Hydroxyacid              | P    | 2.727   | 2-search-DB | 72.0046          | 104.0473        | HMDB0000710 | —             | 1.711207519 | 0.000264891 |

Note: RT, retention time. P, positive mode in LC–MS/MS analysis. N, negative mode in LC–MS/MS analysis.

## Figure captions

Fig.S1 The representative total ion current chromatograms (TIC) in ESI positive (a) and negative (b) modes.

Fig.S2 2D PCA plots from the serum samples of NCW/SHR group, SHR group rats and the QC sample in ESI positive (a) and negative (b) modes. SHR group (red circle, n = 6); NCW/SHR group (green triangle, n = 6); QC (quality control samples, black square, n = 3).

Fig.S3 OPLS-DA plots from the serum samples of NCW/SHR group and SHR group rats in ESI positive (a) and negative (b) modes. SHR group (green square, n = 6); NCW/SHR group (orange circle, n = 6).

Fig.S4 OPLS-DA permutation test results from the serum samples of NCW/SHR group and SHR group rats in ESI positive (a) and negative (b) modes.

Fig.S1

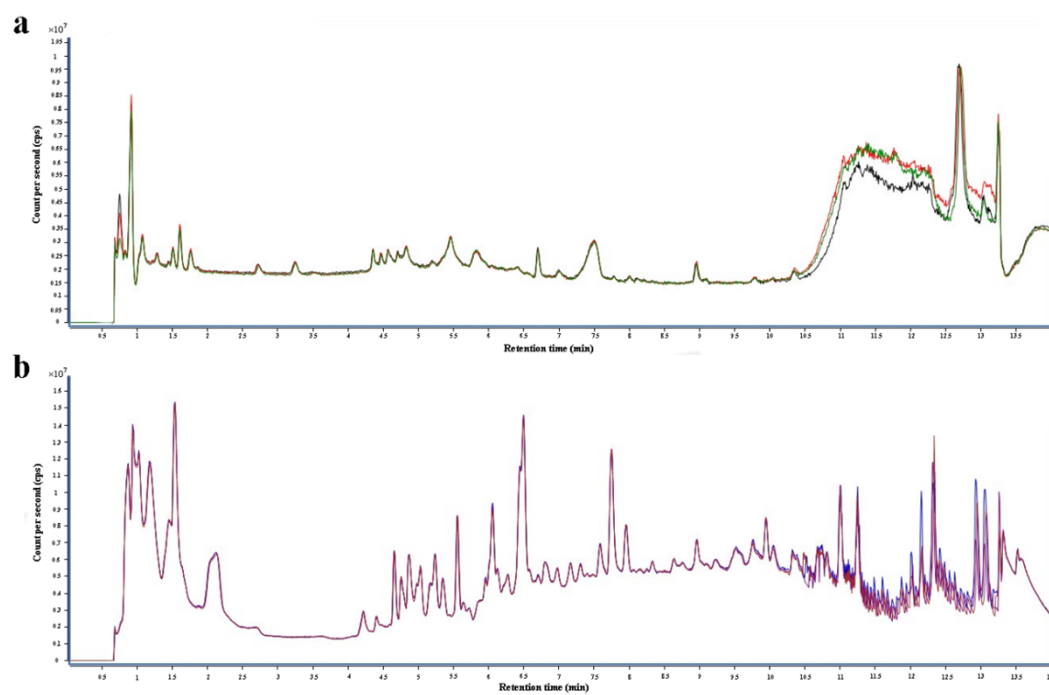

Fig.S2

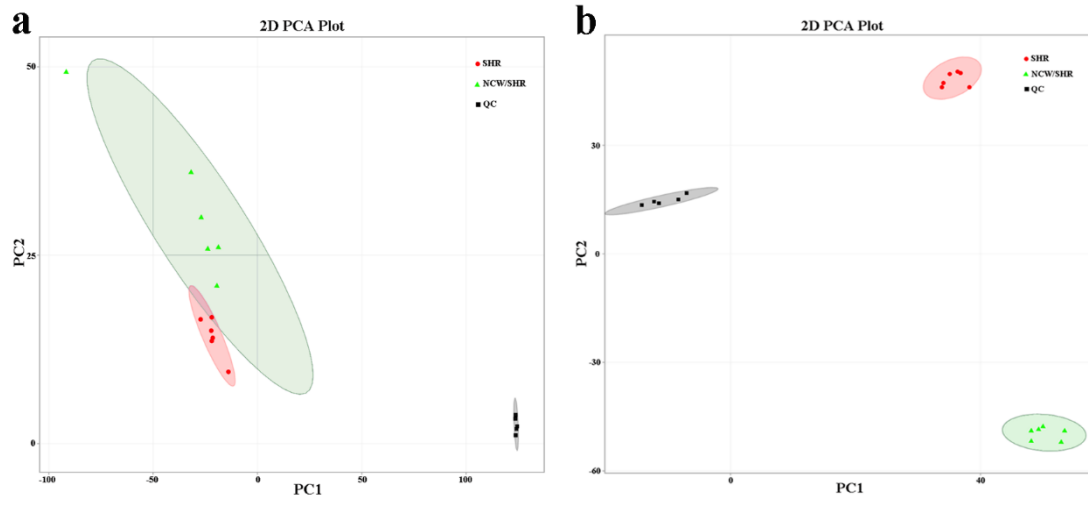

Fig.S3

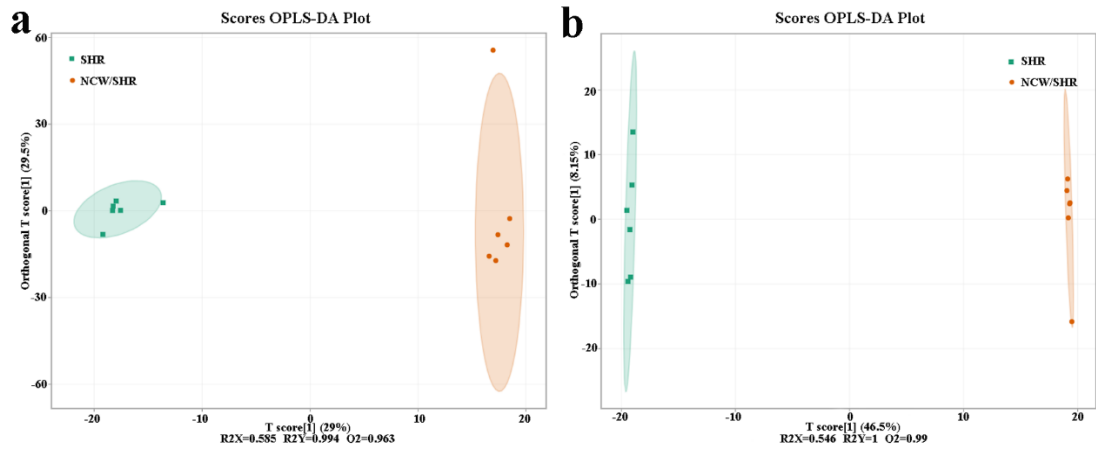

Fig.S4

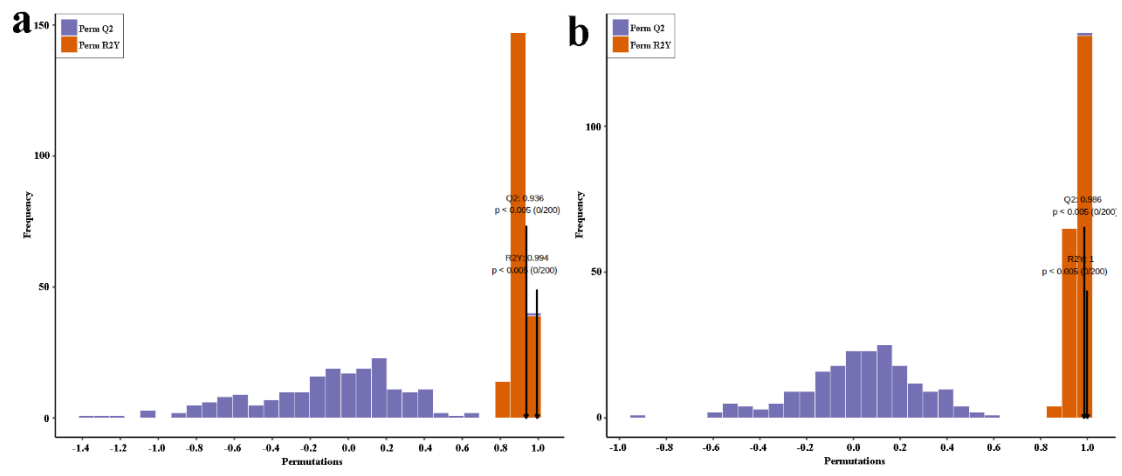

Supplement: d1fo03924e1.pdf [file d1fo03924e1.pdf]
